# Supplementary material for: Association of metallic elements with telomere length in children with autism spectrum disorder
Source: PeerJ. 2025 Apr 1;13:e19174. doi: 10.7717/peerj.19174 (PMC11970416; doi:10.7717/peerj.19174)
Supplement: Supplemental Information 1 [file peerj-13-19174-s001.xlsx]

## Sheet: Sheet1
V1	sensory	communication	movement	language	lifecare	toll_score	cars_score	chid_sex	child_age	child_eth	child_residence	child_hgt	child_wgt	disease	child_TL	Zchild_TL	Mn	Cu	Zn	Ca	Mg	Fe	child_screen_time	child_behavior	decoration_time	out_time	father_gestage	mother_gestage	father_occupy	mother_occupy	father_edu	mother_edu	family_income	family_history	birth_weight	regular_food	mother_smoking	father_smoking	living_environment
1	0	0	0	0	0	0	0	1	5	1	1	106	15	0	7030.7	0.508022	11.2	1085.4	4.6	69.2	36.6	408.9	1	1	2	1.5	29	25	2	2	1	1	2	0	3	2	2	2	2
2	0	0	0	0	0	0	0	1	4	1	1	100	15	0	1247.2	-1.71235	10.2	1040.2	4.6	70.3	38.8	397.1	1	1	2	2	27	26	2	2	1	1	1	1	3.7	1	2	2	1
3	0	0	0	0	0	0	0	2	5	1	1	113	42	0	9124.4	1.31182	10.3	995.8	4.3	67.3	38.3	457.7	1	1	2	2	27	26	2	2	2	1	2	1	3.55	1	2	1	2
4	0	0	0	0	0	0	0	1	5	2	1	104	17	0	8893.8	1.22329	9.8	1060.1	4.4	71.4	37.8	418.7	1	0	1	1	22	22	2	2	1	1	2	1	2.75	1	2	1	2
5	0	0	0	0	0	0	0	1	5	1	1	104	17	0	7410.3	0.653756	10.9	975.2	5.1	64	37.6	454.1	1	1	2	2	20	20	2	2	1	2	1	0	3.3	1	2	1	2
6	0	0	0	0	0	0	0	2	5	1	1	104	18	0	4133.9	-0.604104	11.1	1034.9	4.5	63.6	35.1	445.9	1	1	2	2	25	28	2	2	1	2	2	0	3.8	1	2	2	2
7	0	0	0	0	0	0	0	1	5	1	1	108	18	0	5523.3	-0.0706921	11.4	824.8	4.9	63.5	34.5	451.9	1	1	2	1	24	20	2	2	1	1	2	0	3	1	2	2	2
8	0	0	0	0	0	0	0	1	4	1	1	105	16	0	4724.3	-0.37744	7.8	969	4.2	60.6	38.9	469.4	1	0	1	1	21	23	2	2	2	1	1	0	3.06	1	2	1	2
9	0	0	0	0	0	0	0	1	5	1	1	105	16.5	0	4127.4	-0.606599	8.6	842.9	4.5	67.4	33.5	432.5	1	1	2	1.5	25	19	2	2	1	1	2	0	2.6	1	2	2	1
10	0	0	0	0	0	0	0	1	5	1	1	101	17	0	7614	0.731959	7.8	1114.4	4.6	67.7	36.2	426.8	1	1	2	1	21	19	1	1	1	1	1	0	3	1	2	1	2
11	0	0	0	0	0	0	0	2	5	1	1	103	15.6	0	4684.1	-0.392874	13.8	1090.2	4.2	65.1	39.2	462.6	1	1	1	2	25	26	2	2	1	1	2	0	3.6	2	2	2	2
12	0	0	0	0	0	0	0	2	4	1	1	106	20	0	7168.6	0.560963	12.1	999.3	4.9	66.5	37.3	459.7	2	1	1	1	34	32	2	2	1	1	2	0	3.5	1	2	1	2
13	0	0	0	0	0	0	0	2	4	1	1	97	12.6	0	4047.8	-0.637159	11.5	1130.5	4.5	65.5	35.9	459.1	1	1	2	3	26	23	2	2	1	1	1	0	3.1	1	2	2	2
14	0	0	0	0	0	0	0	1	6	1	1	105	16	0	4321.4	-0.53212	16.9	1240.2	6.2	66.2	33.3	431.7	2	1	1	2	23	24	1	1	1	1	1	0	2.6	1	2	2	2
15	0	0	0	0	0	0	0	1	5	1	1	101	15.3	0	7480.1	0.680553	15.4	854.9	4.6	62.2	38.2	453.9	1	0	2	2	23	22	2	2	1	1	1	0	2.5	1	2	2	2
16	0	0	0	0	0	0	0	1	5	1	1	112	21	0	6919.7	0.465407	10.7	943.2	4.1	65.7	39.7	465.9	1	1	2	1	27	18	2	2	1	1	2	0	3.4	1	2	1	2
17	0	0	0	0	0	0	0	1	5	1	2	113.5	18.6	0	10271.1	1.75206	10.6	1089.3	5.2	62.1	41.2	522.6	1	1	2	1	18	18	1	1	2	1	2	0	3.6	1	2	2	2
18	0	0	0	0	0	0	0	1	5	2	1	119	19.5	0	5766.3	0.0225993	13.5	912.3	5.1	62.7	38	446.3	1	1	2	2	25	30	2	2	1	1	1	0	3.75	1	2	2	2
19	0	0	0	0	0	0	0	1	4	1	1	105	16.7	0	5477	-0.0884674	14.6	975.4	4.5	67.8	34	458.1	1	1	1	3	24	21	1	2	1	2	1	0	4.2	1	2	2	2
20	0	0	0	0	0	0	0	2	5	1	1	95	30	0	10196.3	1.72334	12.2	1003.9	5.7	62.7	43	458.1	1	1	2	1	20	23	2	2	2	1	1	0	3.5	2	2	2	2
21	0	0	0	0	0	0	0	1	5	1	1	100	14.8	0	3962.8	-0.669792	15.7	971	5.3	63.5	35.8	473.5	1	1	2	2	29	27	1	1	1	1	1	0	2.3	2	2	2	2
22	0	0	0	0	0	0	0	1	6	1	1	112	16	0	8767.7	1.17488	14.9	1052.1	4.8	65.4	42.4	494.8	1	1	1	1	31	30	2	2	2	1	2	0	3.55	2	2	1	2
23	0	0	0	0	0	0	0	1	5	1	1	113	18.5	0	4664	-0.40059	9.9	1140.3	7	64.9	34.1	465.5	1	0	2	1	26	26	2	2	1	1	2	0	3.4	1	2	1	2
24	0	0	0	0	0	0	0	1	5	1	1	103	14.5	0	4342.5	-0.524019	17.1	1180.7	5.4	70.4	36.8	447.1	1	1	2	1	23	24	2	2	1	1	2	1	2.9	1	2	1	2
25	0	0	0	0	0	0	0	1	4	1	1	109	21.3	0	8032.6	0.892666	8.8	855.8	5.1	61.8	40.8	470	1	1	1	3	26	25	2	2	1	1	2	0	3.3	1	2	2	2
26	0	0	0	0	0	0	0	1	4	1	1	108	16	0	4461.7	-0.478256	10.1	1100	4.2	69.4	38.2	427	1	0	2	2	24	24	2	2	1	1	2	0	2.8	1	2	2	2
27	0	0	0	0	0	0	0	1	5	1	1	117	36	0	8473.5	1.06193	18.3	1140.1	5.5	61.8	43.8	504.8	1	1	2	3	25	24	1	2	1	1	1	0	3.4	1	2	1	2
28	0	0	0	0	0	0	0	1	4	1	1	113	19	0	5158.5	-0.210744	5.6	1185.3	6.1	65.6	33.8	402.3	1	1	2	2	28	25	2	2	1	1	2	0	3	2	2	2	2
29	0	0	0	0	0	0	0	1	4	2	1	104	17.8	0	7688	0.760369	11.7	973.8	4.3	70.2	36.9	439.8	1	1	2	1	29	29	2	2	1	1	2	0	3.6	1	2	2	2
30	0	0	0	0	0	0	0	1	5	1	1	114	23	0	5482.6	-0.0863175	12.5	1165.1	3.2	62.2	38.4	448.4	2	0	2	1	23	23	2	2	1	1	1	0	3.8	1	2	2	2
31	0	0	0	0	0	0	0	1	5	1	2	115	17	0	7782.5	0.796649	13.9	914.6	4	68.5	37	427.5	1	1	2	1	28	28	2	2	1	1	2	0	3.25	1	2	2	2
32	0	0	0	0	0	0	0	1	6	1	1	113	17	0	4474.7	-0.473266	12.9	1020.8	6.1	62.1	34.4	446.6	1	1	2	1	23	26	2	2	1	1	2	0	3.4	1	2	2	2
33	0	0	0	0	0	0	0	1	6	1	1	120	25	0	9413.1	1.42266	16.4	1063.2	4.9	69.3	35.2	384.9	1	1	2	2	35	25	2	2	1	1	2	0	3.35	1	2	2	2
34	0	0	0	0	0	0	0	1	5	1	1	112	17.5	0	3649.4	-0.790111	6.3	945.2	4	67.6	38.4	428	1	0	2	2	30	27	2	2	1	1	2	0	3.7	1	2	2	2
35	0	0	0	0	0	0	0	1	4	1	1	108	35	0	10500.7	1.84021	10.9	996.9	4	70.5	41.5	406	1	1	1	4	24	26	2	2	2	1	1	0	3.2	1	2	1	2
36	0	0	0	0	0	0	0	1	5	1	1	108	18	0	3720.5	-0.762814	13.5	996.5	5	65.7	36.5	476.9	1	1	2	1	24	25	2	2	1	1	2	0	3.3	1	2	2	1
37	0	0	0	0	0	0	0	1	4	1	1	110	16	0	5102.9	-0.23209	11.5	846.9	5.8	70.3	35	370.7	1	1	2	2	29	26	2	2	1	1	2	0	2.5	1	2	2	2
38	0	0	0	0	0	0	0	1	6	1	2	115.5	18.2	0	6174.7	0.17939	16.9	1057.9	4.6	67.9	50.7	458.4	1	1	2	1	24	24	2	2	1	2	1	0	3.75	1	2	2	1
39	0	0	0	0	0	0	0	1	5	2	1	104	16	0	5716.6	0.00351868	12.6	874.8	3.9	64.5	38	478.9	1	1	1	1	27	24	2	2	1	1	1	0	3.3	1	2	2	2
40	0	0	0	0	0	0	0	1	5	1	1	112.5	19.7	0	4897.2	-0.311061	11.2	868.4	4.3	65.6	42.4	409	1	1	2	2	26	26	2	2	1	1	1	0	3.25	1	2	1	2
41	0	0	0	0	0	0	0	1	5	1	1	112	18.8	0	6186.5	0.18392	12.5	983.3	4.4	63.8	39.4	511.6	1	0	2	1	28	22	2	2	1	1	2	0	3.5	1	2	1	2
42	0	0	0	0	0	0	0	1	4	1	1	106	21	0	2667.8	-1.16696	12.1	1046.3	5.1	63.8	42.9	473	1	1	2	1.5	29	28	2	2	1	1	2	0	3.29	1	2	1	2
43	0	0	0	0	0	0	0	1	5	1	1	117	19	0	6271.5	0.216553	7.8	1188.9	5.2	67.7	36.6	470.9	1	1	2	6	30	26	2	2	1	1	2	0	2.4	1	2	2	2
44	0	0	0	0	0	0	0	1	6	1	1	117	21	0	4980.9	-0.278928	9.7	906.5	4.4	61.9	38.2	444.9	1	1	2	3	32	32	2	2	1	1	1	0	3.8	1	2	2	2
45	0	0	0	0	0	0	0	1	6	1	1	110	17.5	0	5308.3	-0.153234	15.9	1093.1	4.6	69.5	36.5	404.1	1	0	1	2	25	26	2	2	1	1	1	0	3.4	1	2	2	2
46	0	0	0	0	0	0	0	1	5	1	1	113	22	0	4006.7	-0.652938	8.8	1028.2	5.4	70.1	32.7	385.7	1	1	1	2.5	26	22	2	2	1	1	1	0	3.9	2	2	2	2
47	0	0	0	0	0	0	0	1	4	1	1	109	19.5	0	8889.5	1.22164	10.7	907.7	5.1	70.9	39.5	438.7	1	1	2	2	25	24	2	2	1	1	2	0	3.85	1	2	1	2
48	0	0	0	0	0	0	0	1	0	1	1	111	17.5	0	5480	-0.0873156	12.5	952.6	4.9	65	42.7	471.7	1	1	2	1.5	20	19	2	2	1	1	2	0	4	1	2	2	2
49	0	0	0	0	0	0	0	1	5	1	1	112	19	0	4545.3	-0.446161	12.4	958.1	5	66.7	40	472.9	1	1	1	2	28	29	2	2	1	1	2	0	3.5	1	2	2	2
50	0	0	0	0	0	0	0	1	5	1	1	105	28	0	4195.2	-0.58057	12.6	1140.7	3.7	66.6	45.4	483.6	1	1	2	2	19	20	2	2	1	1	2	0	3	1	2	2	2
51	0	0	0	0	0	0	0	1	5	1	1	105	19	0	781.6	-1.8911	13.6	999.9	4.4	64.7	35.4	415.1	1	0	2	2	20	20	2	2	2	1	1	0	3.7	1	2	1	2
52	0	0	0	0	0	0	0	2	4	1	1	101	31	0	4055.1	-0.634356	12	1059.5	4.4	68.7	37.8	434.7	1	1	1	1.5	34	34	2	2	1	1	2	1	3.5	2	2	2	2
53	0	0	0	0	0	0	0	2	6	1	1	109	21	0	7258.7	0.595554	11.1	864.8	4.3	65.3	33.8	479.4	1	1	2	1	27	27	2	2	1	1	2	0	3.2	1	2	2	2
54	0	0	0	0	0	0	0	1	5	1	1	110	18	0	5298	-0.157188	15.6	798	5.6	63.9	39.7	484.3	1	1	2	1	29	30	2	2	1	1	2	0	3.2	2	2	2	2
55	0	0	0	0	0	0	0	1	5	1	1	110	19	0	4487.1	-0.468505	13.7	1028.7	4.6	70.1	42.8	444.9	2	1	2	1	25	22	2	2	1	1	2	0	3	2	2	2	2
56	0	0	0	0	0	0	0	1	4	1	1	105	39	0	19387.7	5.25206	9.9	1021.4	4	69.7	40.2	410.6	1	1	2	1	28	29	2	2	1	1	2	0	3.7	1	2	1	2
57	0	0	0	0	0	0	0	1	5	1	2	108	18	0	4018.9	-0.648254	13.2	1087.6	4.9	65.3	36.3	438.8	1	1	2	2	21	21	2	2	1	2	2	0	2.3	2	2	1	2
58	0	0	0	0	0	0	0	2	4	1	1	107	34	0	4091.1	-0.620535	13.1	1141.3	4.4	66.3	37	422.8	1	1	2	2	27	25	2	2	1	1	2	0	2.5	1	2	2	2
59	0	0	0	0	0	0	0	1	5	1	1	109.5	19.2	0	5969.9	0.100764	11.3	996.4	4.2	65.7	36.7	440	1	1	1	3	22	24	2	2	1	1	1	0	3	1	2	2	2
60	0	0	0	0	0	0	0	1	4	1	1	110	17	0	4611.9	-0.420592	11.3	1359.3	5.2	70.5	40	444	1	1	1	0.5	35	32	2	2	1	1	2	0	3.12	1	2	2	2
61	0	0	0	0	0	0	0	1	4	1	1	105	16	0	3474.2	-0.857373	8.9	1403.9	4.8	72	38.8	424	1	1	1	0.5	35	32	2	2	1	1	2	0	3.1	1	2	2	2
62	0	0	0	0	0	0	0	2	4	1	1	108	20	0	8858.8	1.20986	17.8	1013	4.5	69	38.9	450	1	1	2	2	32	27	2	2	1	2	2	0	3.3	1	2	1	2
63	0	0	0	0	0	0	0	1	4	1	1	107	18	0	8207.6	0.959851	11.3	1077.7	3.7	63.2	40.4	477.1	1	1	2	3	29	26	2	1	1	1	2	0	3	1	2	2	2
64	0	0	0	0	0	0	0	2	5	1	1	115	19	0	4693.6	-0.389227	11.3	913.3	5.1	65.5	39	441.2	1	1	2	1	24	21	2	1	1	1	2	0	3.3	1	2	2	2
65	0	0	0	0	0	0	0	1	5	1	1	120	21	0	3723.1	-0.761816	11.2	988.8	5.5	58.9	43.2	531.2	1	0	2	2	23	18	2	2	2	1	1	0	3	1	2	1	1
66	0	0	0	0	0	0	0	1	5	1	1	110	17	0	8622.2	1.11902	10.7	1064.3	4.9	67	40.8	479.1	1	0	2	1	22	23	2	2	1	1	2	1	3.125	2	2	2	2
67	0	0	0	0	0	0	0	1	5	1	1	110	19	0	8150.6	0.937968	11.6	1240.1	8.4	69.4	36.5	433.8	1	0	1	1	23	23	2	2	1	1	2	0	2.7	1	2	2	1
68	0	0	0	0	0	0	0	2	6	1	1	116	20	0	4064.5	-0.630748	12.9	845.7	3.8	63.7	36.9	449.5	1	1	2	1	28	23	2	2	1	1	2	0	3	1	2	1	2
69	0	0	0	0	0	0	0	2	4	1	1	103	14	0	6334.6	0.240778	9.6	1090.5	4.5	64.2	33.5	470.3	1	1	2	2.5	35	29	2	2	1	1	1	0	3.05	2	2	2	2
70	0	0	0	0	0	0	0	1	5	1	1	105	17.6	0	6740.2	0.396494	5.1	1318.6	7.1	72.2	35.3	365.9	1	0	2	2	27	23	2	2	2	1	1	0	3.6	1	2	2	2
71	0	0	0	0	0	0	0	1	4	1	2	105	16	0	5813.1	0.0405665	6.4	1123.9	5.9	72.3	37	379.7	1	1	2	0.5	22	22	1	2	1	2	2	0	3.8	2	2	2	2
72	0	0	0	0	0	0	0	1	5	1	1	100	15	0	5221.1	-0.186711	16.8	1109.9	4.8	64.1	37.7	471.7	1	1	2	2	32	31	1	2	1	1	2	0	3	1	2	2	2
73	0	0	0	0	0	0	0	1	4	1	1	100	18	0	9343.4	1.3959	13.8	1011.8	3.7	69.6	37.4	431.7	1	1	2	2	25	25	2	2	2	2	2	0	3.9	2	2	1	2
74	0	0	0	0	0	0	0	1	5	1	1	111	17.5	0	492.9	-2.00194	12.3	999.9	4.4	61.8	37.3	458.5	1	1	2	0.3	28	23	2	2	1	1	2	0	3	1	2	2	2
75	0	0	0	0	0	0	0	1	5	1	1	115	20	0	4219.7	-0.571164	12.1	1049.4	4.8	59.6	34.7	473.1	1	1	2	2	25	26	2	2	1	1	2	0	2.7	1	2	2	2
76	0	0	0	0	0	0	0	1	4	1	1	102	15.3	0	10778.5	1.94686	6.1	1007.3	4.5	69.9	35.9	405.4	1	1	2	1	25	24	2	2	1	1	2	0	4	1	2	2	2
77	0	0	0	0	0	0	0	1	5	1	1	109	16.5	0	11157	2.09217	9	1131.4	7.4	64.8	38.3	416.2	1	1	2	2	35	22	2	2	2	1	2	0	3.1	2	2	1	2
78	0	0	0	0	0	0	0	1	6	1	1	120	19	0	9892.3	1.60663	12.8	1147	5.3	66.6	39.1	454.9	1	0	2	1.5	22	20	2	2	1	1	2	0	3.2	1	2	1	2
79	0	0	0	0	0	0	0	1	4	1	1	101	33	0	4994.2	-0.273822	10.9	1126.2	6.2	63.3	36.9	523	1	1	2	1	30	31	2	2	1	1	1	0	3.25	1	2	2	2
80	0	0	0	0	0	0	0	1	4	1	1	100	14.5	0	3581.6	-0.81614	9.4	1020.9	5.1	71.3	36.7	424.9	1	0	2	2	38	26	2	1	2	1	1	0	2.6	1	2	1	1
81	0	0	0	0	0	0	0	1	6	1	1	113	17	0	5033.3	-0.258811	5.5	1250.3	5.7	66.9	33.7	381	1	1	2	2	21	21	2	2	1	1	2	0	3.5	1	2	2	2
82	0	0	0	0	0	0	0	1	5	1	1	105	16.7	0	3967.5	-0.667987	12.8	1164.6	5	63.6	38.2	415.5	1	1	2	2	22	23	2	2	1	1	2	0	3.2	1	2	2	2
83	0	0	0	0	0	0	0	1	5	1	1	102	15.6	0	9575.4	1.48497	9.2	1295.8	8.1	63.1	35.8	429.9	1	1	2	1	28	28	2	2	1	1	2	0	3.2	1	2	2	2
84	0	0	0	0	0	0	0	1	6	1	1	120	26	0	6816.4	0.425749	15.9	964.6	4.6	63.9	39	506	1	1	2	2	29	24	2	2	1	1	2	0	3.4	1	2	2	2
85	0	0	0	0	0	0	0	1	5	1	1	115	20	0	11106.3	2.07271	11.6	1135.5	4.8	65.7	37.4	436.2	1	1	1	2	30	31	2	2	1	1	1	0	3.25	1	2	1	2
86	0	0	0	0	0	0	0	1	5	1	1	100	17	0	4739.6	-0.371566	11.7	911.2	5.3	67.8	34.6	377.4	1	0	2	2	32	29	2	2	1	1	1	0	3	2	2	1	2
87	0	0	0	0	0	0	0	1	4	1	1	104	30	0	3862.5	-0.708298	10.1	1074.1	3.5	67.1	35.2	449.4	1	1	2	2	23	24	2	2	1	1	2	0	3.25	1	2	2	2
88	0	0	0	0	0	0	0	1	6	1	1	118	26	0	7896.3	0.840339	9.4	1119.9	4.5	69	38	450.2	1	1	2	1	22	29	2	2	1	1	2	0	3.4	1	2	1	2
89	0	0	0	0	0	0	0	1	5	1	1	120	46	0	3593.4	-0.81161	14.3	1028	4.8	66.4	35.6	462.3	1	1	1	1	33	32	2	2	1	1	1	0	3.9	1	2	2	2
90	0	0	0	0	0	0	0	1	4	1	1	106	18	0	4020.8	-0.647525	12.6	888.2	4.1	66.7	40.5	451.1	1	0	1	3	26	24	1	1	1	1	1	0	3.25	1	2	2	2
91	0	0	0	0	0	0	0	1	5	1	1	110	17	0	5515.5	-0.0736867	12.9	1015.1	4.8	69.4	36.9	431.6	1	1	2	2	29	31	2	2	1	1	1	0	3	1	2	2	2
92	0	0	0	0	0	0	0	1	5	1	1	110.5	17.8	0	6792.6	0.416611	9	1162	4.9	78.1	37.7	433.9	1	1	2	4	36	34	2	2	1	1	2	0	3.4	1	2	2	2
93	0	0	0	0	0	0	0	1	5	1	2	100	29	0	5836.5	0.0495501	9.7	980.5	4	66.9	39.9	439.3	1	1	1	1.5	21	20	2	2	1	1	2	0	2.8	1	2	2	2
94	0	0	0	0	0	0	0	2	6	1	1	111	20.3	0	18115.7	4.76372	12.4	891.9	5	64.7	43.2	512	1	1	2	3.5	23	19	2	2	1	1	2	0	3.4	1	2	2	2
95	0	0	0	0	0	0	0	1	6	1	2	120	19	0	5512.8	-0.0747232	15.4	1169.3	5.4	65.3	38.6	447.1	1	1	1	2	22	22	2	2	2	1	1	0	3.5	1	2	2	2
96	12	17	7	14	7	57	37	1	6	1	1	112	19	1	4608.7	-0.421821	12.9	1024.1	6.1	63.3	46.1	502	1	0	1	3	32	32	2	2	1	1	2	1	3.4	1	2	2	2
97	0	16	3	18	4	41	29	1	4	2	1	105	19.5	1	3795.6	-0.733995	18.1	1005.5	5	58	40.6	537.8	1	0	2	1	28	30	2	2	1	2	1	0	4	1	2	1	1
98	9	20	2	23	12	66	38	2	6	1	2	100	16	1	4939.2	-0.294937	19.7	1004.6	5.1	69.1	41.2	438.5	1	0	1	4	26	20	2	2	2	1	1	0	3.4	1	2	2	2
99	0	8	11	12	16	47	30	1	5	1	1	106	16.5	1	3840.6	-0.716706	10.7	1001	5	64.5	45.2	501.1	1	1	2	1	32	31	2	2	1	1	1	0	3.4	2	2	1	2
100	0	4	3	10	15	31	27	1	4	1	2	95	13	1	5104.9	-0.231322	10.4	947.7	4.9	64.1	38.4	480.4	1	1	2	3	31	30	2	2	1	1	1	0	1.25	1	2	2	2
101	3	12	15	13	6	49	39	1	5	1	1	103	18	1	7498.6	0.687655	12.1	956.3	4.6	65.8	46	464.3	1	0	1	1	38	33	2	2	1	1	1	0	2.65	1	2	2	1
102	6	17	12	13	8	56	30	1	5	1	1	105	17	1	3096.1	-1.00253	10.3	829.1	4.9	63.1	38.3	446.2	1	1	2	0.5	32	31	2	2	1	1	1	1	3	1	2	2	1
103	6	16	6	15	12	55	28	1	4	1	1	103	18	1	7720.1	0.772693	13.4	925.5	4.8	72.6	40.5	470.4	1	1	2	2	48	31	2	2	1	2	2	0	3.5	1	2	1	2
104	6	4	10	17	14	51	26	1	4	1	1	100	17	1	4751.6	-0.366959	11.7	1210.7	4.6	65.1	40.9	467.2	1	1	2	2.5	36	31	2	2	1	1	2	1	3.21	2	2	2	2
105	6	13	4	13	9	45	32	1	5	1	1	110	20	1	8398.6	1.03318	10.7	1013.2	4.2	66.6	40.3	427.3	1	0	2	1	40	40	2	2	2	2	1	0	2.8	2	2	1	2
106	6	0	5	15	13	39	35	1	4	1	1	95	14	1	3638.2	-0.794411	11.8	1014.4	5.2	64.8	38	457.4	1	1	2	1	34	33	2	2	1	1	1	0	2.75	1	2	2	2
107	3	22	5	7	9	46	40	2	2	1	1	83	10.5	1	3730.5	-0.758975	11.8	947.8	5.1	68.6	40	449.6	1	0	2	1	33	32	2	2	1	1	1	0	3.45	1	2	2	2
108	4	9	2	16	3	34	26	1	5	1	1	105	16.5	1	6279.8	0.21974	14.4	996.5	4.8	65	41.7	470	1	1	2	1.5	31	33	2	2	1	1	2	1	3.2	1	2	2	2
109	15	10	14	15	20	74	30	1	8	1	1	113	37	1	6555.9	0.325739	9.4	861.5	5.2	65.1	39.9	460.8	1	0	2	0.5	28	26	2	2	1	1	1	0	2.5	2	2	2	2
110	7	12	6	14	6	45	33	2	5	1	1	108	20	1	4522.5	-0.454914	12.8	1214	4.9	63.9	41	441.7	1	0	2	2	35	28	2	2	1	1	2	0	3.2	1	2	2	1
111	13	23	11	8	13	68	26	1	5	1	1	95	14	1	3230.9	-0.950779	14.7	1235.9	5.7	59	36.6	403.7	1	1	1	1	32	32	2	2	1	1	1	1	3.3	1	2	2	1
112	8	17	0	19	5	49	34	1	6	1	1	113	23.3	1	4081.5	-0.624221	15.1	1099.5	4.7	59.6	38.4	466.2	1	1	2	4	28	28	2	2	1	1	1	0	2.6	1	2	2	2
113	9	20	7	12	11	59	27	1	6	1	1	114	23.4	1	3902.2	-0.693057	16.3	983.1	4.6	59	37.5	472.3	1	0	2	4	28	28	2	2	1	1	1	0	2.8	1	2	2	2
114	4	10	4	28	14	60	41	1	5	1	1	120	24	1	3794.5	-0.734405	11.8	986.8	5.8	65.7	38.9	464.9	1	0	2	2	32	27	2	2	1	1	1	0	3.8	2	2	1	2
115	15	8	19	24	17	83	32	1	4	2	2	100	14	1	11222.9	2.11747	14	1037	4.8	71.5	37.9	435.7	1	0	1	1	34	29	1	1	2	2	1	1	3.3	2	2	1	2
116	2	20	6	21	9	58	41	1	3	1	1	94.4	13.65	1	3889.9	-0.697779	21.4	892.4	4.8	60.6	41.3	490	2	1	2	3	39	30	2	2	1	1	2	0	2.8	1	2	1	2
117	3	21	9	17	13	63	31	1	5	1	1	110	18	1	4018.1	-0.648561	12.2	919.4	4.6	60.6	41.5	463.6	1	1	2	2	31	30	2	2	1	1	2	0	3.3	2	2	2	2
118	8	14	0	18	10	50	30	1	3	1	1	95.6	13.5	1	4265	-0.553773	9.3	901.8	4.5	64.8	34.5	428.4	1	1	1	2	33	29	2	2	1	1	2	0	2.75	1	2	2	2
119	19	23	7	28	11	88	39	1	5	1	2	100	13	1	6214.4	0.194632	14.4	822	4.9	63	39.9	468.5	1	1	2	1	37	36	1	2	1	2	1	0	3	1	2	2	2
120	8	22	15	24	16	85	33	1	2	1	1	84	11.5	1	10826.5	1.96529	10.7	1040.9	3.5	69.9	38.4	430	1	0	1	1	32	30	2	2	1	1	1	0	4.1	2	2	1	2
121	12	15	4	8	7	46	31	1	4	1	1	107	21	1	4452.2	-0.481904	11.2	1269.9	4.9	64.1	41.7	448.3	1	1	2	1	31	29	2	2	1	1	1	0	3.3	1	2	2	1
122	3	12	0	21	3	39	28	1	4	1	1	105	19	1	3666.1	-0.783699	10.5	1218.1	4.2	68.2	36.4	403	1	1	2	1	31	28	2	2	1	1	2	1	2.7	1	2	2	1
123	4	14	4	13	11	46	30	2	4	1	1	110	26	1	3999.4	-0.65574	11.7	894.4	3	66.2	40.3	424.8	2	0	2	1	46	45	2	2	1	1	2	0	3.1	1	2	2	2
124	8	26	4	21	22	81	38	1	6	1	2	112	18	1	2928.4	-1.06691	13.7	1007.6	4.9	70.7	38.5	409.6	1	1	1	1	27	31	1	2	2	1	1	0	3.3	2	2	2	2
125	9	20	36	15	15	95	38	1	6	1	1	116	19	1	3737.2	-0.756403	12.1	1004.3	5	66.8	40	474.6	1	0	2	2.5	33	27	2	2	1	1	1	1	3.35	1	2	1	2
126	7	17	0	18	7	49	31	1	4	1	1	98	15	1	2982	-1.04634	9.7	1057.5	4	64.3	37.8	418	1	1	2	1	32	32	2	2	1	1	1	0	3.2	1	2	1	1
127	3	10	11	4	2	30	27	1	6	1	1	106	32	1	3093.5	-1.00353	7.6	1258.8	5.9	61.2	35.1	446.8	1	0	2	1.5	41	37	2	2	1	1	2	0	3	2	2	1	2
128	7	23	0	11	16	47	30	1	6	1	2	115	23	1	10866.8	1.98076	9.5	1247	4.5	63.3	36.8	457.7	1	0	2	2	38	34	1	1	2	1	1	0	2.7	1	2	2	2
129	12	13	14	12	10	51	26	1	7	1	1	120	23	1	3838.5	-0.717512	12.8	977.5	4.6	62.1	37.3	487.8	1	1	1	1	30	29	2	1	1	1	1	0	3.5	1	2	2	2
130	11	12	0	7	4	34	27	2	5	1	1	110	20	1	4367.4	-0.51446	12.2	879.9	4.1	60.2	41.3	481	1	1	1	2	35	31	2	2	1	1	2	0	3.3	1	2	2	2
131	6	17	2	10	21	56	37	1	4	1	1	103	19	1	3920.1	-0.686185	14.9	884.3	4.3	57.7	36.3	442.5	1	0	1	1.5	33	30	2	2	1	1	1	0	3.6	1	2	2	2
132	7	13	16	19	14	69	30	1	11	1	1	157	60	1	3353.6	-0.903673	11.7	923.4	4.9	66.2	38.6	424.4	2	0	2	2	27	23	2	2	1	2	1	0	3.6	2	2	1	1
133	7	16	10	10	1	44	31	1	8	1	1	120	21.5	1	6918.1	0.464793	16.5	963.3	4.9	61.6	45.7	490.3	1	0	1	3	29	25	2	2	1	2	1	0	2.2	2	2	2	1
134	3	17	4	12	7	43	31	1	7	1	1	125	25	1	5049.6	-0.252553	17.2	1003	4.6	61.7	40.7	473.2	1	1	2	1	28	27	2	2	1	1	1	0	3.7	1	2	1	2
135	7	17	8	9	15	56	32	1	7	1	1	125	23	1	3990.2	-0.659272	13.4	886.2	5.9	65.6	37.7	482.2	1	1	2	1	30	30	2	2	1	1	1	0	3.25	1	2	2	1
136	6	20	6	6	1	39	26	1	8	1	1	135	40	1	2958.2	-1.05547	9.7	977.2	3.7	67	44.3	473.5	2	0	2	0.5	29	27	2	2	1	2	1	0	3.5	1	2	2	2
137	8	20	0	7	7	42	32	1	5	1	1	115	20.5	1	7197.6	0.572097	10.4	918.9	5.3	64.7	39	485.4	1	1	2	2	33	31	2	2	1	1	1	0	2.95	1	2	2	2
138	9	16	9	8	9	51	30	1	5	1	1	107	19	1	650.5	-1.94143	16.4	855.4	4.2	64	39.7	448.2	2	1	2	2	28	29	2	2	1	2	1	0	3.6	1	2	1	1
139	12	24	13	14	5	68	37	1	15	1	2	115	33	1	8190.5	0.953286	15.5	1065	4.3	57.5	45.9	498.4	1	1	2	3	30	23	1	1	2	2	1	0	2.55	2	2	2	2
140	16	20	4	7	10	57	37	2	9	1	1	142	33	1	1467.7	-1.6277	13.7	799	4.9	67.4	38.4	433.3	1	0	1	1	37	34	1	2	1	1	2	0	3.4	1	2	2	1
141	3	24	4	12	8	51	27	1	8	1	1	133	29	1	4480	-0.471231	8.9	889.4	3.9	65.7	39.4	469.5	2	0	2	1	34	33	2	1	1	1	1	0	2.8	1	2	2	2
142	3	18	3	8	11	43	28	1	4	1	1	100	36	1	6006.5	0.114816	13.9	1067.5	4.1	67.3	40.8	493.1	1	1	2	1	28	26	2	2	1	2	1	0	3.3	1	2	2	2
143	15	20	2	7	4	48	37	1	6	1	2	120	44	1	5562	-0.0558346	14.6	861.1	4.4	68.4	40.1	462	1	0	2	2	21	21	2	2	2	2	1	0	3.6	2	2	1	2
144	11	23	18	11	12	75	38	1	5	1	1	105	15.2	1	5780	0.0278589	11.7	1094.5	4.7	67.5	44.6	459.4	2	1	2	3	28	27	2	2	1	1	2	0	3.45	1	2	1	2
145	8	20	0	10	9	47	32	1	4	1	1	101	15	1	8667.8	1.13653	13.4	905.4	4.4	66.9	41.5	441.5	1	0	2	1	47	46	2	2	2	2	1	0	3.4	1	2	1	2
146	6	10	10	15	10	51	27	1	7	1	1	128	24.5	1	5021.1	-0.263514	16.9	1061.2	6.1	60.9	40.7	470.9	1	0	1	2	39	38	2	2	1	1	2	0	2.6	2	2	1	2
147	0	22	7	18	10	57	30	2	4	1	1	110	24	1	4655	-0.404065	14.6	976.7	5.8	71.6	42.9	409.9	1	0	1	2.5	28	28	1	2	1	1	2	0	3.7	1	2	1	1
148	6	18	16	28	15	83	45	1	4	2	1	99.7	15.4	1	5644.9	-0.0240272	18.2	1047.9	4.5	64.6	39.4	426.6	1	0	2	1	43	30	2	2	1	2	1	0	3.05	1	2	1	2
149	13	19	6	19	10	67	39	1	2	1	1	95.2	13	1	4249.4	-0.559781	12.3	1086	4.3	64.3	38	403.4	1	0	2	1.5	30	30	2	2	1	1	1	0	3	1	2	2	2
150	10	7	2	18	14	51	32	1	3	1	1	97	15	1	4019.7	-0.647947	17.8	1044.6	5	70	38.9	444.2	1	0	2	2	32	32	2	2	1	1	1	0	2.75	2	2	2	2
151	10	14	0	5	15	44	34	1	5	1	1	112	17	1	4390.6	-0.505572	14.2	861.8	4.3	62.4	35.6	405.9	1	1	2	1	31	28	2	2	1	1	1	0	3.8	1	2	2	1
152	12	21	9	14	6	62	39	1	5	1	1	109	17	1	7311.8	0.615953	14.6	1072	5.1	67.7	38.4	433.5	2	0	2	1	29	28	1	2	2	2	1	0	3.1	2	2	1	1
153	2	17	0	18	14	51	41	1	3	1	2	100	14	1	4187.7	-0.583449	13.1	1058.9	3.5	65.4	40.7	457.6	2	1	1	1	38	29	2	2	2	2	1	0	3.25	2	2	1	2
154	5	21	0	16	6	48	31	1	4	1	1	105	15	1	5103.5	-0.23186	11.8	915.9	4.9	66.1	39.9	427.4	1	0	2	2	28	28	2	2	1	1	1	0	3.8	1	2	2	2
155	8	19	7	17	10	61	33	1	4	1	2	107	15.5	1	6002.7	0.113357	9.8	1000.5	3.6	63.2	40.6	460.1	1	0	2	3	27	23	2	2	1	1	1	0	2.85	1	2	2	2
156	11	11	0	7	4	33	27	1	3	1	2	98	13.5	1	4299.3	-0.540604	14.1	953.6	4.3	70.4	34.5	389.9	1	1	1	4	27	29	2	2	1	1	1	0	3.75	2	2	1	1
157	6	9	4	18	6	44	28	1	2	1	2	85	11	1	4513	-0.458581	9.1	1238.1	5.8	70.7	36.9	383.3	2	0	1	3	27	24	1	2	2	2	1	0	2.7	1	2	1	2
158	14	10	8	7	15	54	41	1	4	1	1	109	18	1	4471.3	-0.474571	8.2	907.7	4	64.8	40.1	426.9	1	1	1	2	35	35	2	2	1	1	1	0	3.9	1	2	1	1
159	12	23	6	7	5	53	36	2	6	1	2	120	25	1	5335.8	-0.142676	10.2	955.3	3.8	60.4	36.1	454.9	2	1	1	2	32	28	2	2	2	1	1	0	4.5	2	2	1	1
160	19	24	19	10	13	85	41	1	4	1	1	102	16.5	1	5857.4	0.0575547	19.7	1044.8	4.9	65.8	42.4	474.6	1	0	1	1	34	37	1	2	1	1	1	0	2.15	2	2	2	2
161	1	13	10	12	9	45	31	1	4	1	2	120	18	1	4249.4	-0.559774	12.6	814.1	4.2	68.9	36	391.9	1	1	2	1.5	31	31	2	2	1	1	1	0	2.8	2	2	2	1
162	8	8	8	11	14	49	33	1	2	1	2	87	12	1	7572.3	0.715937	9.3	1421.3	5.8	61.5	37.6	433.6	2	0	2	0.5	30	31	2	2	1	2	1	0	3.1	1	2	1	2
163	7	10	9	18	16	60	37	1	3	1	2	95	25	1	4633.1	-0.412473	19.1	955.4	5.1	67.1	35.7	408.9	1	1	1	1	34	37	2	2	2	2	1	0	3.33	1	2	2	2
164	6	18	0	12	6	42	30	1	7	2	1	136	35	1	4330.5	-0.528626	16.1	902.6	4.8	63.4	38.1	451.1	1	0	2	1	33	29	2	2	1	1	2	0	3.7	1	2	2	2
165	15	22	23	29	8	96	35	1	5	1	1	118	22	1	4720.1	-0.379072	16.3	1070.7	4.5	62.7	37.3	437.6	1	0	1	2	27	25	2	2	1	1	1	1	3.3	2	2	2	2
166	8	24	9	21	16	78	37.5	1	4	1	1	106	18	1	2824.3	-1.10688	8.8	1117.4	5.2	63.5	45.7	450.7	1	0	1	2	43	40	2	2	1	1	1	0	3	1	2	2	2
167	12	14	0	6	4	36	31	1	8	1	1	136	24	1	3538.5	-0.832706	15	891	4.5	65.8	37.9	437.5	1	1	1	0.5	30	29	2	2	1	1	1	0	2.2	1	2	2	1
168	9	20	0	14	3	46	39.5	1	6	1	1	115	19.6	1	4775.8	-0.357669	18	1160.5	5.4	62.1	44.2	470	1	1	2	1	32	29	2	2	1	1	1	1	2.8	1	2	2	2
169	9	15	7	9	7	47	30	2	7	1	1	136	35	1	4616.4	-0.418865	12.4	753.8	4.8	62.1	40.1	454.4	1	0	2	1.5	38	33	2	2	1	1	1	0	3.6	1	2	2	2
170	14	24	3	8	9	58	37	2	6	1	1	120	22	1	4614.5	-0.419613	18.3	926.4	5.2	60	41.6	445.7	2	0	2	2	31	25	2	2	1	2	2	0	3.2	1	2	2	2
171	0	15	0	15	9	39	28	1	3	1	1	103	16	1	7019.3	0.503632	14.7	1126.8	4	69	42.3	423	1	0	2	2	37	35	2	2	1	1	1	0	3	1	2	1	1
172	8	12	3	13	5	41	31	1	2	1	2	97	13.2	1	12171	2.48146	12.3	1130.2	4.3	74.1	37.7	357.7	1	1	2	3	45	27	1	2	1	2	1	0	3.3	1	2	1	2
173	19	23	6	11	9	68	38	2	5	1	1	105	15	1	5475.5	-0.0890433	13.1	973.5	3.7	62.2	39.9	417.6	1	0	2	1	36	36	2	2	1	1	1	0	2.8	2	2	2	2
174	6	13	3	18	9	49	28	2	3	1	1	108	16	1	4135.5	-0.603502	9.8	920.1	3.5	68.2	35.4	400.1	1	1	2	2	33	33	2	2	1	1	1	0	4	1	2	2	2
175	2	0	8	17	9	36	32	1	2	1	2	96	27	1	5935.6	0.0875961	12.5	962.7	4.2	67.1	40.1	404.1	1	1	2	2	26	28	2	2	2	2	1	0	3.6	1	2	1	2
176	6	22	22	16	16	82	42	1	2	1	1	84	12	1	4117.5	-0.610413	12.9	1198.4	4.3	67.7	38.9	409	1	0	1	1	29	28	2	2	1	1	1	0	2.7	2	2	2	1
177	7.81	16.09	6.91	14.09	9.95	54.59	32.95	1	6	1	2	108	16.5	1	6637.7	0.357143	17.2	938.8	5.3	64.9	42.3	459.3	1	0	2	1	25	26	1	2	2	2	1	0	2.7	2	2	1	1
178	7.81	16.09	6.91	14.09	9.95	54.59	32.95	1	4	1	1	100	16	1	5575.8	-0.0505366	10.2	1051.1	4.7	66.7	39.2	416.1	1	0	1	2	28	27	2	2	1	1	2	1	3.2	1	2	2	2
