# Supplementary material for: Association of metallic elements with telomere length in children with autism spectrum disorder
Source: PeerJ. 2025 Apr 1;13:e19174. doi: 10.7717/peerj.19174 (PMC11970416; doi:10.7717/peerj.19174)
Supplement: Supplemental Information 2 [file peerj-13-19174-s002.xlsx]

## Sheet: Sheet1
chid_sex	1=Male, 2=Female
child_eth	1=Han, 2=Other
child_residence	1=Urban, 2=Rural
disease	1=ASD, 0=Healthy children
child_screen_time	1=≤2h，2=＞2h
child_behavior	0=Yes，1=No
decoration_time	1=≤5years，2=＞5years
father_occupy	1 = Blue collar, 2 = White collar
mother_occupy	1 = Blue collar, 2 = White collar
father_edu	1 = Undergraduate and above, 2 = High school and below
mother_edu	1 = Undergraduate and above, 2 = High school and below
family_income	1 = <300,000, 2 = ≥300,000
family_history	0 = No, 1 = Yes
regular_food	2 = No, 1 = Yes
mother_smoking	2 = No, 1 = Yes
father_smoking	2 = No, 1 = Yes
living_environment	2 = Quiet, 1 = Noisy
